# Supplementary material for: Machine Learning Tools Applied for Training Optimization in Handball
Source: Preprints.org preprint supplement (doi:10.20944/preprints202308.0372.v3), 2023-10-16

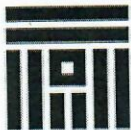

**Universitatea  
Transilvania  
din Brașov**

Bulevardul Eroilor 29  
500036 - Brașov  
tel.: (+40) 268.413.000 | fax: (+40) 268.410.525  
[rectorat@unitbv.ro](mailto:rectorat@unitbv.ro) | [www.unitbv.ro](http://www.unitbv.ro)

No.285./Date.03.10.2023

*TRANSILVANIA UNIVERSITY OF BRASOV*

FACULTY OF PHYSICAL EDUCATION AND MOUNTAIN SPORTS

### ETHICS COMMISSION OF RESEARCH

**The Research Ethics Commission from the Faculty of Physical Education and Mountain Sports, met on September, 29, 2023 discussed the request regarding the approval of the research work, " Machine Learning Tools Applied for Training Optimization in Handball ", online questionnaire.**

The questionnaire was appraised online ( <https://forms.gle/QkVS4NxBJ6TXrbPB7> ), anonymously, and the participants gave their consent before starting the completion (I agree to participate in this study / I do not agree to participate in this study).

President of the ethics committee and dean of the faculty,  
**Associate Professor Phd Ioan Turcu**

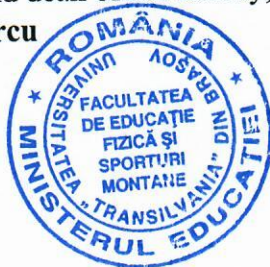

Supplement: Supplementary file 1 [file supplementary]
